# Supplementary material
Source: publisher figshare collection journal article supplement (https://acs.figshare.com/ndownloader/files/4517821)
Supplement: Supplementary file 1 [file 4517821]

# Supporting Information

## for

### Effects of Clioquinol on Metal-Triggered Amyloid- $\beta$ Aggregation Revisited

Allana M. Mancino, Sarmad S. Hindo, Akiko Kochi, and Mi Hee Lim\*

*Department of Chemistry and the Life Sciences Institute, University of Michigan, 210 Washtenaw Avenue, Ann Arbor, Michigan, 48109*

#### Materials and Procedures

All reagents were purchased from commercial suppliers and used as received unless stated otherwise. All solutions including buffers were prepared from Millipore water, treated with chelex overnight, and filtered through a 0.22- $\mu$ m acetate filter in order to remove any traces of metals. Optical spectra were obtained on an Agilent 8453 UV-visible spectrophotometer. CD measurements were acquired with a Jasco J-810 spectropolarimeter fitted with a 150-W xenon lamp. The BCA Protein Kit from Thermo Fisher Scientific was used and measurements were collected on a SpectraMax M5 microplate reader.

**Amyloid- $\beta$  Peptide Experiments.** Amyloid- $\beta$  (1-40) peptide (1 mg, EZBiolab) was purchased, dissolved with ammonium hydroxide ( $\text{NH}_4\text{OH}$ , 1% v/v, aq), aliquoted, lyophilized, and stored at  $-80^\circ\text{C}$ . The stock solution (ca. 200  $\mu\text{M}$ ) for the reactions was made by redissolving  $\text{A}\beta$  with  $\text{NH}_4\text{OH}$  (1% v/v, aq, 10  $\mu\text{L}$ ) followed by dilution with ddH<sub>2</sub>O or with buffer solutions. All  $\text{A}\beta$  samples were prepared by previously reported procedures.<sup>1,2</sup> For the inhibition studies, solutions of samples contained freshly prepared  $\text{A}\beta$  (10, 25, or 100  $\mu\text{M}$ ), metal ion ( $\text{CuCl}_2$  or  $\text{ZnCl}_2$ , 10, 25, or 100  $\mu\text{M}$ ) with or without CQ (20, 50, or 100  $\mu\text{M}$ ; the stock solution of CQ was in DMSO with a 1% final DMSO concentration). All solutions were incubated for 24 h at  $37^\circ\text{C}$  with constant agitation, and analyzed by UV-vis, TEM, or BCA protein analysis. For the disaggregation studies, CQ (20, 50, or 200  $\mu\text{M}$ ; the stock solution was in DMSO with a 1% final DMSO concentration) was treated for 2 h or 24 h ( $37^\circ\text{C}$ , constant agitation)

with A $\beta$  fibrils, generated by reacting freshly prepared A $\beta$  (10, 25, or 100  $\mu$ M) with or without metal ions (10, 25, or 100  $\mu$ M) for 24 h at 37 °C with continuous agitation. Buffer solutions (20  $\mu$ M HEPES, 150  $\mu$ M NaCl) at pH 6.6 and pH 7.4 were used for Cu<sup>II</sup>- and Zn<sup>II</sup>-containing samples, respectively.<sup>1</sup>

**BCA Protein Analysis.** Samples containing freshly prepared A $\beta$  (100  $\mu$ M) and metal ions (CuCl<sub>2</sub> or ZnCl<sub>2</sub>, 100  $\mu$ M) were prepared for inhibition experiments. After 2 min, CQ (200  $\mu$ M, the stock solution of CQ was in DMSO with a 1% final DMSO concentration) was added into the solution followed by incubation (5 min, 15 min, 30 min, 1 h, 2 h, 4 h, and 24 h) at 37 °C with continuous agitation. For disaggregation experiments, the freshly prepared solutions of A $\beta$  (100  $\mu$ M) in the absence or presence of metal ions (100  $\mu$ M) were incubated for 24 h at 37 °C with continuous agitation followed by 2 or 24 h treatment of CQ (200  $\mu$ M). All solutions were centrifuged at 14,000 rpm for 20 min. The supernatants of the samples were analyzed by the BCA Protein Assay Kit.

**Transmission Electron Microscopy.** Samples for TEM were prepared by following previously reported methods.<sup>3,4</sup> Glow-discharged grids (Formar/Carbon 300-mesh, Electron Microscopy Sciences) were treated with samples of A $\beta$  aggregates (25  $\mu$ M, 5  $\mu$ L) for 2 min at room temperature. Excess sample was removed using filter paper followed by washing twice with ddH<sub>2</sub>O. Grids were incubated with uranyl acetate (1% w/v, ddH<sub>2</sub>O, 5  $\mu$ L, 1 min) and were blotted with filter paper and dried for 15 min at room temperature. Images were taken on a Philips CM-100 transmission electron microscope (60 – 80 kV, 19000 – 46000 magnification).

### Full Citations of References

- (11) (a) Cherny, R. A.; Atwood, C. S.; Xilinas, M. E.; Gray, D. N.; Jones, W. D.; McLean, C. A.; Barnham, K. J.; Volitakis, I.; Fraser, F. W.; Kim, Y.; Huang, X.; Goldstein, L. E.; Moir, R. D.; Lim, J. T.; Beyreuther, K.; Zheng, H.; Tanzi, R. E.; Masters, C. L.; Bush, A. I. *Neuron* **2001**, 30, 665-676. (b) Adlard, P. A.; Cherny, R. A.; Finkelstein, D. I.; Gautier, E.; Robb, E.; Cortes, M.; Volitakis, I.; Liu, X.; Smith, J. P.; Perez, K.; Laughton, K.; Li, Q. X.; Charman, S. A.; Nicolazzo, J. A.; Wilkins,

- S.; Deleva, K.; Lynch, T.; Kok, G.; Ritchie, C. W.; Tanzi, R. E.; Cappai, R.; Masters, C. L.; Barnham, K. J.; Bush, A. I. *Neuron* **2008**, *59*, 43-55.
- (18) Ritchie, C. W.; Bush, A. I.; Mackinnon, A.; Macfarlane, S.; Mastwyk, M.; MacGregor, L.; Kiers, L.; Cherny, R.; Li, Q. X.; Tammer, A.; Carrington, D.; Mavros, C.; Volitakis, I.; Xilinas, M.; Ames, D.; Davis, S.; Beyreuther, K.; Tanzi, R. E.; Masters, C. L. *Arch. Neurol.* **2003**, *60*, 1685-1691.

## References

- (1) Storr, T.; Merkel, M.; Song-Zhao, G. X.; Scott, L. E.; Green, D. E.; Bowen, M. L.; Thompson, K. H.; Patrick, B. O.; Schugar, H. J.; Orvig, C. J. *Am. Chem. Soc.* **2007**, *129*, 7453-7463.
- (2) Rodríguez-Rodríguez, C.; de Groot, N. S.; Rimola, A.; Álvarez-Larena, A.; Lloveras, V.; Vidal-Gancedo, J.; Ventura, S.; Vendrell, J.; Sodupe, M.; González-Duarte, P. *J. Am. Chem. Soc.* **2009**, *131*, 1436-1451.
- (3) (a) Evans, C. G.; Wisen, S.; Gestwicki, J. E. *J. Biol. Chem.* **2006**, *281*, 33182-33191. (b) Reinke, A. A.; Seh, H. Y.; Gestwicki, J. E. *Bioorg. Med. Chem. Lett.* **2009**, *19*, 4952-4957.
- (4) Nielsen, E. H.; Nybo, M.; Svehag, S.-E.; Ronald, W. *Methods in Enzymol.* **1999**, *309*, 491-496.

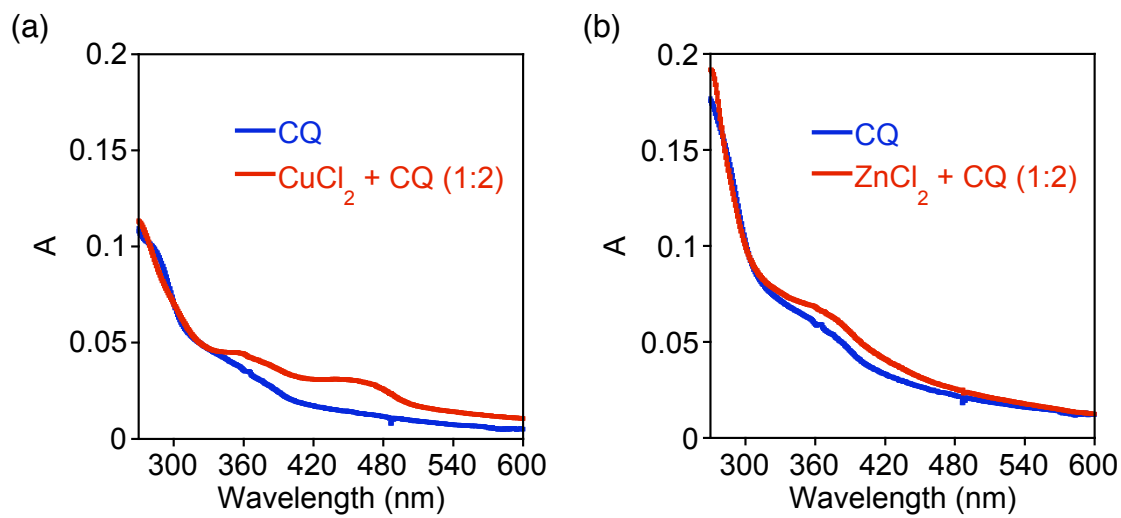

**Figure S1.** UV-visible spectra of solutions containing CQ (20  $\mu\text{M}$ ) with (a) CuCl<sub>2</sub> (10  $\mu\text{M}$ ) and (b) ZnCl<sub>2</sub> (10  $\mu\text{M}$ ) at pH 6.6 and pH 7.4, respectively.

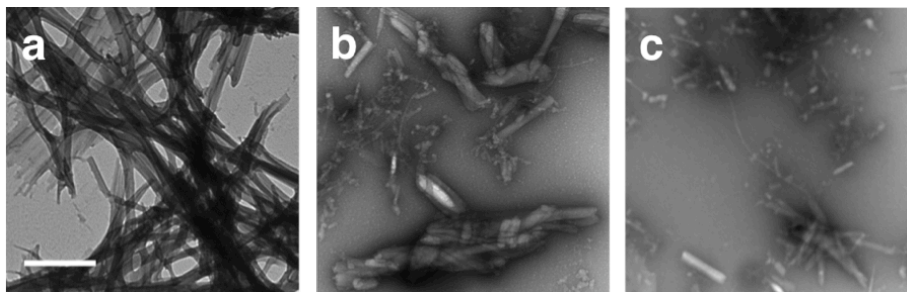

**Figure S2.** TEM images of  $A\beta$  samples (pH 7.4) in the (a) absence or (b) presence of CQ and (c)  $A\beta$  species (pH 6.6) incubated with the Cu complex, generated *in situ* by reacting  $\text{CuCl}_2$  and CQ in a ratio of 1:2 for 30 min prior to addition to peptide ( $[A\beta] = 25 \mu\text{M}$ ,  $[\text{CuCl}_2] = 25 \mu\text{M}$ ,  $[\text{CQ}] = 50 \mu\text{M}$ , 24 h, 37 °C, constant agitation, scale bar = 500 nm).

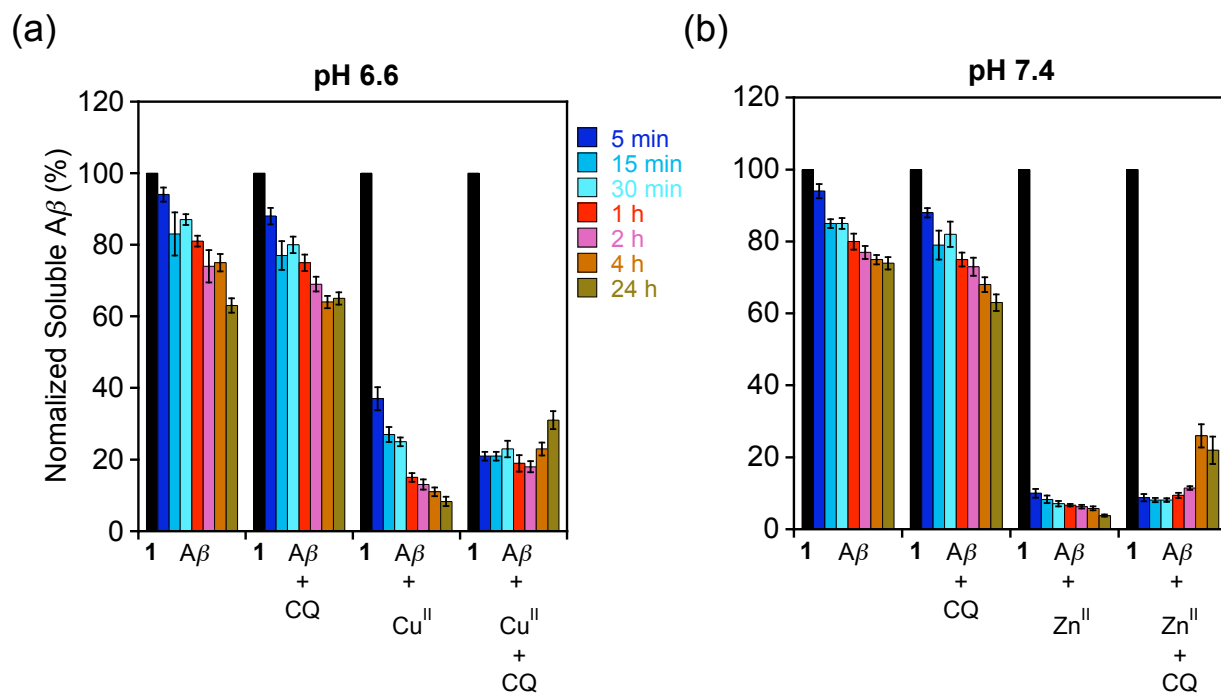

**Figure S3.** Analysis of soluble A $\beta$  (%) in the samples of inhibition experiments (A $\beta$  and metal-A $\beta$  in the absence and presence of CQ) incubated for 5 min – 24 h ( $[A\beta] = 100 \mu\text{M}$ ,  $[\text{CuCl}_2 \text{ or } \text{ZnCl}_2] = 100 \mu\text{M}$ ,  $[\text{CQ}] = 200 \mu\text{M}$ ,  $37^\circ\text{C}$ , constant agitation). The freshly prepared solution of A $\beta$  (1, black) was depicted in the figures. The absorbance was measured at 580 nm.

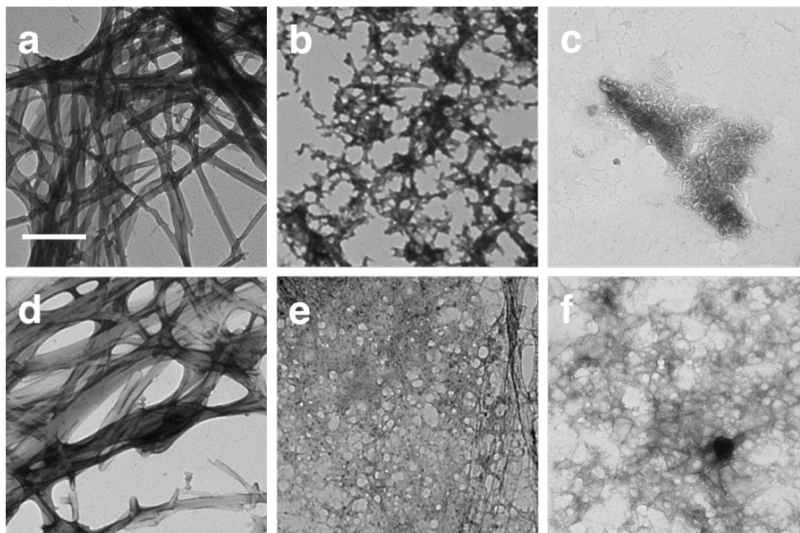

**Figure S4.** TEM analysis of A $\beta$  species upon treatment of CQ. (a) A $\beta$  aggregates (pH 6.6, 24 h); A $\beta$  aggregates incubated with CQ (b) for 2 h and (c) for 24 h; (d) A $\beta$  aggregates (pH 7.4, 24 h); A $\beta$  aggregates incubated with CQ (e) for 2 h and (f) for 24 h ([A $\beta$ ] = 25  $\mu$ M, [CQ] = 50  $\mu$ M, 37  $^{\circ}$ C, constant agitation, scale bar = 500 nm).

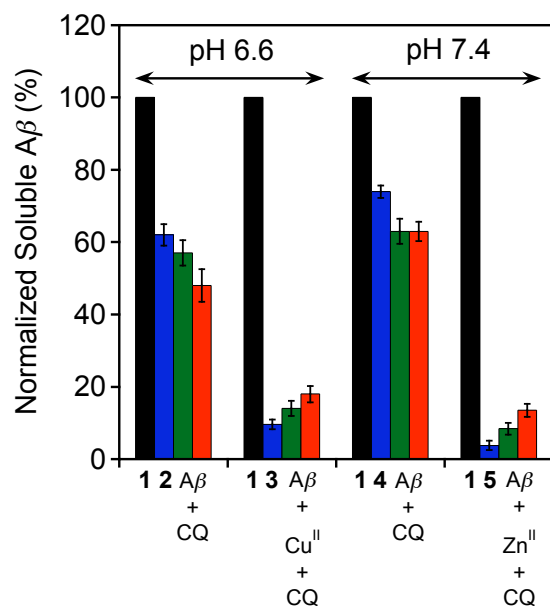

**Figure S5.** BCA protein analysis of samples from the disaggregation studies. The contents of soluble A $\beta$  species from the 24 h incubated samples of A $\beta$  (2 and 4), A $\beta$  + Cu<sup>II</sup> (3), and A $\beta$  + Zn<sup>II</sup> (5) were presented in blue. Solutions of A $\beta$  aggregates were treated with CQ for 2 h (green) or 24 h (red) ([A $\beta$ ] = 100  $\mu$ M, [CuCl<sub>2</sub> or ZnCl<sub>2</sub>] = 100  $\mu$ M, [CQ] = 200  $\mu$ M, 37 °C, constant agitation). The absorbance was measured at 580 nm. The freshly prepared solution of A $\beta$  (1) was also analyzed.



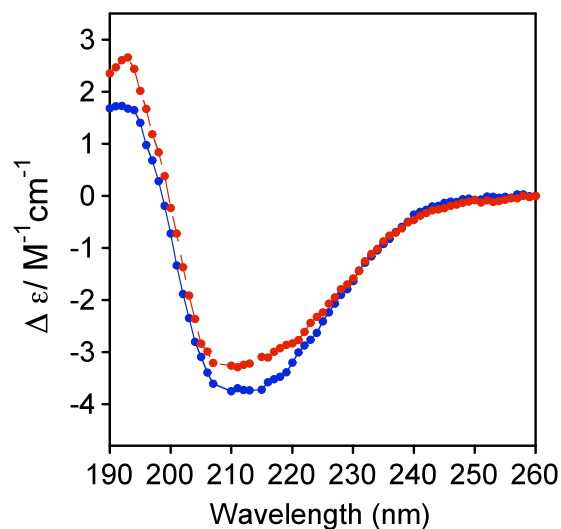

**Figure S6.** CD spectrum of the sample prepared by incubation of A $\beta$  (50  $\mu$ M) with ZnCl<sub>2</sub> (50  $\mu$ M) at 37 °C with constant agitation for 24 h (blue line) in 10 mM sodium phosphate buffer, pH 7.4, 100 mM NaF. Upon 5 h treatment of CQ (100  $\mu$ M) with Zn(II)-induced fibrils, the spectrum (red line) was obtained. All spectra were measured at 1 nm intervals from 190 – 260 nm with a scanning speed of 50 nm/min and a bandwidth of 2.0 nm. Spectra were reported as the average of 20 scans after the subtraction of measurements in the absence of peptide. All measurements were taken using a 1 mm cuvette at 37 °C.

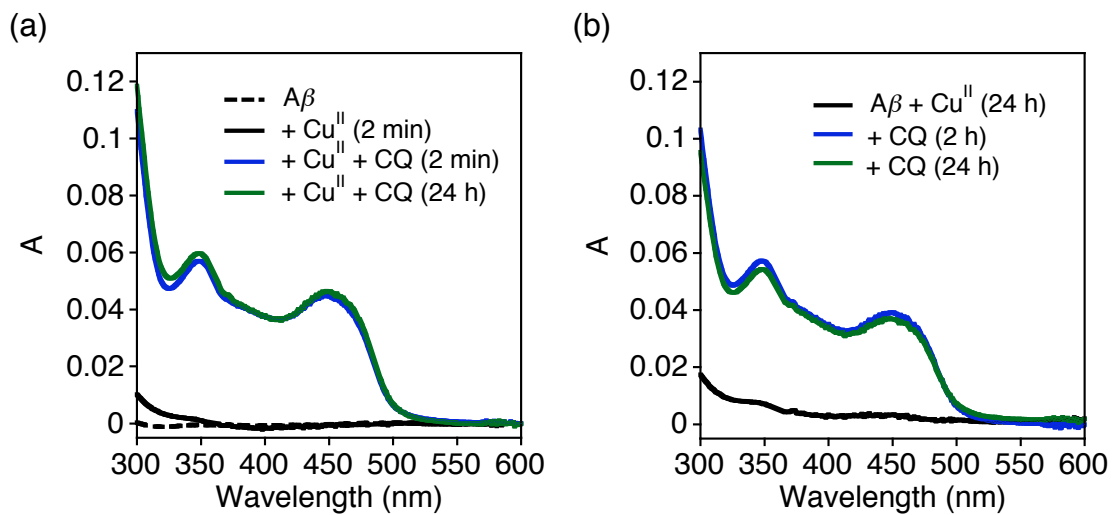

**Figure S7.** UV-visible spectra of the samples from the (a) inhibition and (b) disaggregation experiments. Reactions were carried out using  $A\beta$  ( $10 \mu M$ ),  $CuCl_2$  ( $10 \mu M$ ), and CQ ( $20 \mu M$ ) at pH 6.6.
